# Essential Titles for Mental Health Professionals

## Clinical Manual of Palliative Care Psychiatry

Nathan Fairman, M.D., M.P.H., Jeremy M. Hirst, M.D., and  
Scott A. Irwin, M.D., Ph.D.

Psychiatrists and residents are faced with the task of refreshing their In recent years, palliative care has emerged as the leading model of person-centered care focused on preserving quality of life and alleviating distress for people and families experiencing serious and life-limiting medical illness. Alongside this development has come a growing recognition of the need for expertise in psychiatric diagnosis, psychopharmacology, and psychotherapy within the interdisciplinary team of specialists tasked with identifying and addressing the varied sources of suffering in patients with advanced medical illnesses. The *Clinical Manual of Palliative Care Psychiatry* was written to motivate and guide readers—whether mental health clinicians or palliative care providers—to deepen their understanding of the psychosocial dimensions of suffering for the benefit of seriously ill patients and the support of their families.

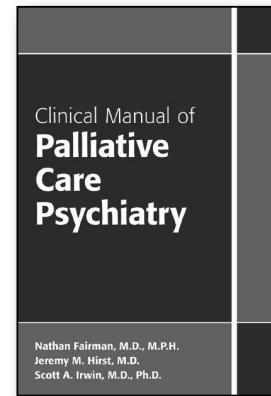

2016 • 304 pages • ISBN 978-1-58562-476-8 • Paperback • \$61.00 • Item #62476

2016 • 304 pages • ISBN 978-1-61537-061-0 • eBook • \$48.95 • Item #37061

## People With Mental Illness in the Criminal Justice System

Answering a Cry for Help

Group for the Advancement of Psychiatry  
Committee on Psychiatry and the Community

Written by a committee of the Group for the Advancement of Psychiatry, *People With Mental Illness in the Criminal Justice System: Answering A Cry for Help* represents the collective wisdom of leaders in community psychiatry and is the third in a series of successful publications that have used Dear Abby letters as source material. The letters, submitted by readers with experience with mental illness and the criminal justice system, constitute a rich, real-world repository for the case stories presented in this fascinating volume. Using the experiences shared in the letters, the authors employ the Sequential Intercept Model to present a series of chapters offering detailed recommendations for psychiatrists, group practices, and criminal justice entities on partnering with individuals who are at risk and their families, with the goal of improving outcomes.

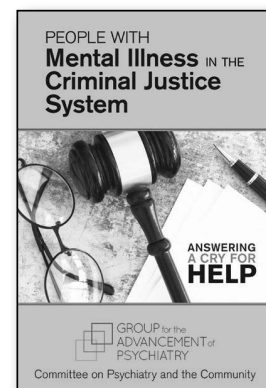

This book can potentially reduce the overrepresentation of people with mental illnesses in justice settings, provide alternatives to incarceration, and divert individuals who do not pose a public safety risk from jail.

2016 • 175 pages • ISBN 978-0-87318-219-5 • Paperback • \$31.50 • Item #7219

2016 • 175 pages • ISBN 978-0-87318-220-1 • eBook • \$25.00 • Item #7220

AMERICAN  
PSYCHIATRIC  
ASSOCIATION  
PUBLISHING

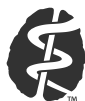

[www.appi.org](http://www.appi.org)

Email: [appi@psych.org](mailto:appi@psych.org)

Toll Free: 1-800-368-5777

20% Discount for American Psychiatric Association Members

25% Discount for APA Resident-Fellow Members

Please use Priority Code AH1711A when ordering.

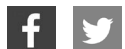

# Pocket Guide to Addiction Assessment and Treatment

Edited by Petros Levounis, M.D., M.A.,  
Erin Zerbo, M.D., and Rashi Aggarwal, M.D.

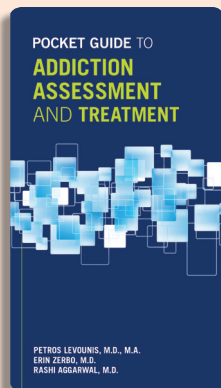

*The Pocket Guide to Addiction Assessment and Treatment* is designed specifically to aid a wide range of clinicians, regardless of their training in addiction, to more confidently assess and treat this patient population. With an accessible, easily referenced format, this book serves as a go-to resource for general psychiatrists and other practitioners involved in the addiction treatment field. And because all of the diagnostic discussions are DSM-5<sup>®</sup>-based, readers can be confident that they're getting the most relevant and up-to-date guidance on the topic.

2016 • 379 pages • ISBN 978-1-58562-512-3 • Paperback  
\$65.00 • Item #62512

2016 • 379 pages • ISBN 978-1-58562-512-3 • eBook  
\$52.00 • Item #37072

AMERICAN  
PSYCHIATRIC  
ASSOCIATION  
PUBLISHING

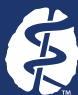

www.appi.org  
Email: appi@psych.org  
Phone: 1-800-368-5777

AH1710A

# UNMATCHED GROWTH OPPORTUNITIES

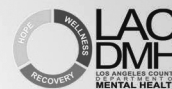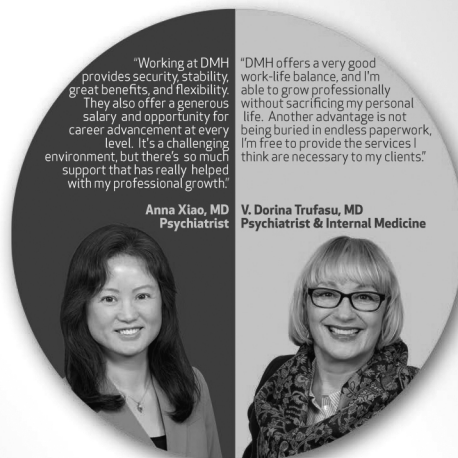

Anna Xiao, MD  
Psychiatrist

V. Dorina Trufasu, MD  
Psychiatrist & Internal Medicine

The Los Angeles County Department of Mental Health has immediate openings with Jail Mental Health Services, Juvenile Justice Correctional Facilities, Antelope Valley, and directly operated programs. This is your chance to join the leading mental health agency in the nation and work in a safe, diverse, and challenging environment. Our entire department is filled with opportunities for professional development and growth, and is expanding exponentially with 27 new full-time psychiatrist positions. We offer competitive salaries with potential bonuses up to \$30,000\* a year, depending on qualifications and placement, plus up to 24 hours a week is allowed for outside employment.

\*Based on CEO approval at step 15 of the mental health psychiatrist salary schedule.

[www.psychiatristjobs.la](http://www.psychiatristjobs.la)

***Psychiatric Services*** (ISSN 1075-2730; online version, 1557-9700) is published monthly by the American Psychiatric Association, editorial and executive office, 1000 Wilson Blvd., Suite 1825, Arlington, VA 22209-3901. Copyright © 2016 by the American Psychiatric Association. Printed in U.S.A. Periodicals postage paid at Arlington, VA, and at additional mailing offices. POSTMASTER: Send address changes to ***Psychiatric Services***, 1000 Wilson Blvd., Suite 1825, Arlington, VA 22209-3901.

## EDITOR

### ***Psychiatric Research and Clinical Practice***

The American Psychiatric Association (APA) is seeking an Editor for a new journal it is preparing to launch that will publish content on research, clinical practice, and systems of care.

The Editor will work with a small Editorial Advisory Committee comprising the Editors of APA journals as well as the Publisher and key APA Publishing staff.

The Editor is responsible for

- determining directions and trends in science and policy; developing and soliciting content to address these issues
- reviewing submissions to the journal with regard to their rigor, merit, and adherence to ethical standards.
- deciding whether any submission should undergo additional peer review, with recommendations as to whom should be contacted to perform said review

The position is part-time. Most work is done via the Internet and telephone. Candidates must be APA members who have a broad knowledge of research and practice. Candidates should submit a cover letter outlining their qualifications and ideas along with a current CV. Deadline for applications is **February 15, 2017**.

For further information, please contact

**Rebecca Rinehart, Publisher**  
APA Publishing

1000 Wilson Blvd., Suite 1825  
Arlington, VA 22209

[rlinehart@psych.org](mailto:rlinehart@psych.org) | (703) 907-7876

AMERICAN PSYCHIATRIC ASSOCIATION  
PUBLISHING

# New and Essential Geriatric Psychiatry Titles

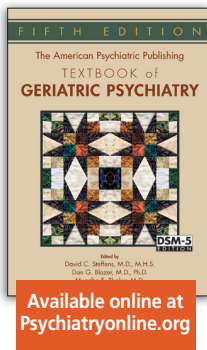

## The American Psychiatric Publishing Textbook of Geriatric Psychiatry, Fifth Edition

*Edited by David C. Steffens, M.D., M.H.S., Dan G. Blazer, M.D., Ph.D., and Mugdha E. Thakur, M.D.*

This Fifth Edition is an indispensable resource for psychiatric clinicians and trainees charged with assessing, diagnosing, and treating mental disorders. Building on the prodigious strengths of previous editions, this revision is the most current, comprehensive, and systematic textbook of geriatric psychiatry available today, and the only one that is DSM-5® concordant.

Widely recognized as the standard in its field, the book serves a critical need for clinicians challenged to meet the mental health needs of an aging population.

2015 • 837 pages • ISBN 978-1-58562-484-3 • Hardcover • \$192.00 • Item #62484

2015 • 837 pages • ISBN 978-1-58562-522-2 • eBook • \$154.00 • Item #62522

2015 • 12 Month Subscription • Online at Psychiatryonline.org • \$166.00 • Item #537005

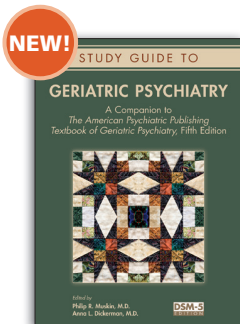

## Study Guide to Geriatric Psychiatry

**A Companion to The American Psychiatric Publishing Textbook of Geriatric Psychiatry, Fifth Edition**

*Philip R. Muskin, M.D., and Anna L. Dickerman, M.D.*

*Study Guide to Geriatric Psychiatry* is a question-and-answer companion that allows you to evaluate your mastery of the subject matter as you progress through *The American Psychiatric Publishing Textbook of Geriatric Psychiatry*, Fifth Edition. The *Study Guide* is made up of approximately 255 questions divided into 25 individual quizzes that correspond to chapters in the textbook. Questions are followed by an answer guide that references relevant text in the textbook. Each answer is accompanied by a discussion that addresses the correct response and also explains why other responses are not correct.

2017 • 352 pages • ISBN 978-1-61537-045-0 • Paperback • \$62.00 • Item #37045

2017 • 352 pages • ISBN 978-1-61537-106-8 • eBook • \$49.95 • Item #37106

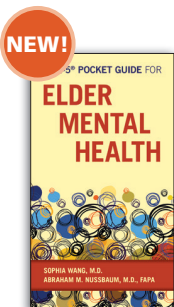

## DSM-5® Pocket Guide for Elder Mental Health

*Sophia Wang, M.D., and Abraham M. Nussbaum, M.D., FAPA*

The *DSM-5 Pocket Guide for Elder Mental Health* is an easily understandable tool for psychiatric and non-psychiatric professionals. It captures the essence of geriatric principles including care coordination, functional status, and the well-being of the caregiver as well as the patient in the context of well-crafted case scenarios. Drs. Wang and Nussbaum have truly operationalized the DSM-5 for geriatric providers and patients.

2017 • 375 pages • ISBN 978-1-61537-056-6 • Paperback • \$65.00 • Item #37056

2017 • 375 pages • ISBN 978-1-61537-119-8 • eBook • \$52.00 • Item #37119

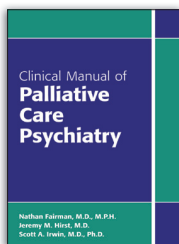

## Clinical Manual of Palliative Care Psychiatry

*Nathan Fairman, M.D., M.P.H., Jeremy M. Hirst, M.D., and Scott A. Irwin, M.D., Ph.D.*

The book seeks to bridge the gulf between principles and practice for two groups of clinicians: front-line palliative care providers with little mental health training and mental health specialists who may lack familiarity with palliative care practice. The book reviews palliative care principles and practice models, treatment of the psychiatric symptoms most commonly encountered in palliative care settings.

2016 • 297 pages • ISBN 978-1-58562-476-8 Paperback • \$61.00 • Item #62476

2016 • 297 pages • ISBN 978-1-61537-061-0 • eBook • \$48.95 • Item #37061

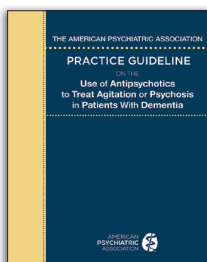

## The American Psychiatric Association Practice Guideline on the Use of Antipsychotics to Treat Agitation or Psychosis in Patients With Dementia

*American Psychiatric Association*

The guideline offers clear, concise, and actionable recommendation statements to help clinicians to incorporate recommendations into clinical practice, with the goal of improving quality of care. Each recommendation is given a rating that reflects the level of confidence that potential benefits of an intervention outweigh potential harms.

2016 • 218 pages • ISBN 978-0-89042-677-7 • Paperback • \$65.00 • Item #2677

2016 • 218 pages • ISBN 978-0-89042-678-4 • eBook • \$52.00 • Item #2678
