JANUARY 2017 | VOLUME 68 | NUMBER 1

# Psychiatric Services

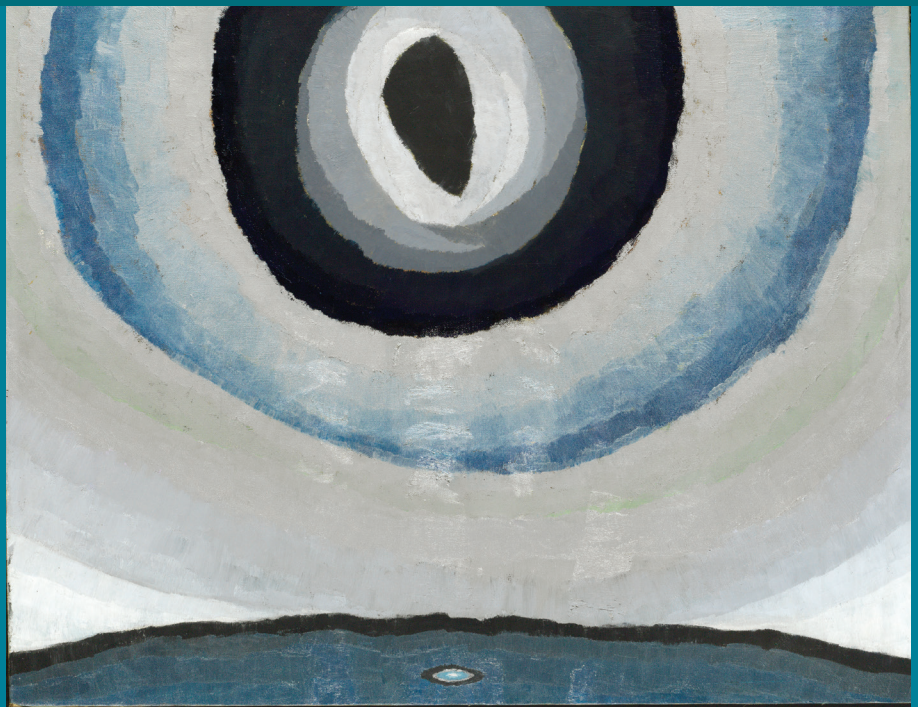

A message from Lisa B. Dixon, M.D., M.P.H., Editor of *Psychiatric Services*

Measuring trends in racial-ethnic disparities, 2004–2012

Collaborative care for perinatal depression among low-income mothers

Does the 2nd Amendment protect gun rights of persons with mental illness?

AMERICAN  
**PSYCHIATRIC**  
ASSOCIATION

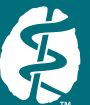

[ps.psychiatryonline.org](http://ps.psychiatryonline.org)
