# There's So Much More to PSYCHIATRIC SERVICES Than Meets the Page!

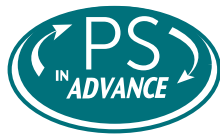

## Psychiatric Services in Advance

Latest research reports!

### Age at First Episode of Psychotic Symptoms: Surprising Findings

Many first-episode psychosis services are designed for people in their 20s. But of nearly 38,000 patients with first episodes served by five large health care systems, half were over age 30.

### Patients' Online Access to Progress Notes Affects the Therapeutic Relationship

Veterans reported that trust in their clinician was either strengthened or strained by whether the notes showed respect. Transparency—or the extent to which notes reflected what happened in the session—also affected trust.

Revisit the field's rich history!

### 50 Years Ago in Psychiatric Services

- The Social Worker as Therapist
- Balancing Psychiatric and Nonpsychiatric Services
- Sensory Distortions in Hospital Corridors and Tunnels

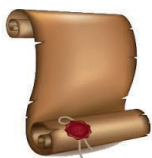

AMERICAN  
PSYCHIATRIC  
ASSOCIATION  
PUBLISHING

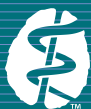

[ps.psychiatryonline.org](http://ps.psychiatryonline.org)

[www.appi.org](http://www.appi.org) • 1-800-368-5777 • Fax: 703-907-1091 • Email: [appi@psych.org](mailto:appi@psych.org)

Priority Code AH1520

## FREE Online Subscription to Psychiatric Services for APA Resident-Fellow Members (RFMs)!

American Psychiatric Association Resident-Fellow Members (RFMs) can receive a free online subscription to *Psychiatric Services*.

Simply visit [ps.psychiatryonline.org](http://ps.psychiatryonline.org) for full-text access to all of the content of APA's highly ranked, peer-reviewed monthly journal. *Psychiatric Services* focuses on service delivery in organized systems of care, evolving best practices, and federal and state policies that affect the care of people with mental illnesses.

Please visit [ps.psychiatryonline.org](http://ps.psychiatryonline.org) and log in with your American Psychiatric Association username and password.

Psychiatry residents who are not currently APA Resident-Fellow Members should consider membership in the American Psychiatric Association. The benefits provided to residents are an example of how the APA serves the needs of its members throughout their careers. The low introductory dues APA extends to RFMs are even waived for the first year. Please visit [www.psychiatry.org/join-apa](http://www.psychiatry.org/join-apa) for more information.

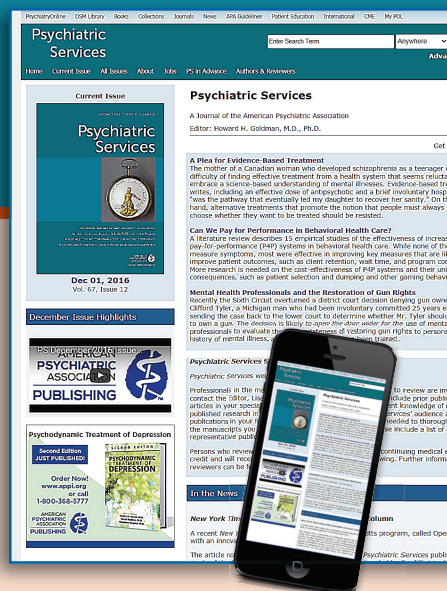

AMERICAN  
PSYCHIATRIC  
ASSOCIATION  
PUBLISHING

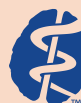

[www.appi.org](http://www.appi.org)  
Email: [appi@psych.org](mailto:appi@psych.org)  
Toll-Free: 1-800-368-5777

AH1709A
